# Supplementary material for: Two novel Ln8 clusters bridged by CO32− effectively convert CO2 into oxazolidinones and cyclic carbonates
Source: Royal Society of Chemistry journal article supplement (doi:10.1039/d3dt01465g), 2023-01-01
Supplement: d3dt01465g1.pdf [file d3dt01465g1.pdf]

## Supporting Information

### Two novel Ln<sub>8</sub> clusters bridged by CO<sub>3</sub><sup>2-</sup> and effectively converting CO<sub>2</sub> into oxazolidinones and cyclic carbonates

Na Qiao,<sup>a</sup> Xiao-Yan Xin,<sup>a</sup> Wen-Min Wang,<sup>\*a,c</sup> Zhi-Lei Wu<sup>\*b,c</sup>, Jian-Zhong Cui<sup>c</sup>

#### Experimental Section

##### Materials and methods

Triethanolamine was obtained from Sigma-Aldrich Co. Ltd., lanthanide salts (Nd(NO<sub>3</sub>)<sub>3</sub>·6H<sub>2</sub>O, Sm(NO<sub>3</sub>)<sub>3</sub>·6H<sub>2</sub>O) were obtained from Energy Chemical Co. Ltd., Aladdin Co. Ltd., acetonitrile and triethylamine were commercially purchased from Sigma-Aldrich Co. Ltd.. All chemical reagents and solvents used in synthetic studies were obtained from commercial sources, of reagent grade, and employed without further purification.

##### Physical measurements

Elemental analyses data (C, H, and N) were obtained on a PerkinElmer 2400 analyzer. The FT-IR spectra data were recorded via a PerkinElmer FT-IR spectrophotometer using KBr pellets from 4000 to 400 cm<sup>-1</sup>. PXRD were performed on a Rigaku Ultima IV instrument at room temperature with the scan speed of 10° min<sup>-1</sup> and the scan range of 2θ from 5–50° through Cu Kα radiation (λ = 1.54056 Å). TGA analyses data were collected on Perkin-Elmer TGA 4000 analyzer with the heating rate 10 °C / min from 30 to 800 °C under air atmosphere. UV-vis spectra were measured on JASCOV-570 spectrophotometer at room temperature. <sup>1</sup>H NMR spectra were collected on a Bruker spectrometer in CDCl<sub>3</sub> at 400 MHz. The XPS data was collected on a Kratos Axis Ultra DLD multi-technique X-ray spectrometer. (ICP) tests were carried out by an ICP-9000(N+M). High resolution mass spectrum was performed on a Thermo Fisher Trace 1300 +ISQ LT instrument.

---

<sup>a</sup>College of Chemistry and Materials, Taiyuan Normal University, Jinzhong, 030619, China.

<sup>b</sup>College of Chemistry and Materials Science, Hebei University, Baoding 071002, PR China.

<sup>c</sup> Department of Chemistry, Tianjin University, Tianjin, 300072, China.

\*Corresponding Authors E-mails: wangwenmin0506@126.com, wuzhilei03@163.com

### **Catalytic Experiment of CO<sub>2</sub> with aziridines.**

In a typical experiment, cluster **1** (30 mg) was ground and put into a 10 mL autoclave equipped with a magnetic stir bar. Then 1-ethyl-2-phenylaziridine (294.4 mg, 2.0 mmol) and tetrabutylammonium bromide (TBAB) (32.2 mg, 0.1 mmol) were also added into the reaction tube. Then the autoclave was capped under 1 MPa CO<sub>2</sub> and stirred at 70 °C for 10 h. Afterwards, the mixture was dissolved in CH<sub>2</sub>Cl<sub>2</sub>. The yield of corresponding oxazolidinones were determined by <sup>1</sup>H NMR and 1,3,5-trimethoxybenzene is used as internal standard. To explore the recycling performance, the catalyst of cluster was collected centrifugally after each reaction, washed with methanol and dried completely for the next cycle.

### **Catalytic Experiment of CO<sub>2</sub> with styrene oxide.**

CO<sub>2</sub>, 25 mg cluster, 2 mmol styrene oxide and 3mol % mol TBAB were added into Schlenk tube and stirred at 80 °C for 12 h. Then 2 mL dichloromethane was added to reactor and the mixture was purified by column chromatography. By 1,3,5-trimethoxybenzene using as internal standard, the yield was calculated by <sup>1</sup>H NMR spectroscopy. To explore the recycling performance, the catalyst of cluster was collected centrifugally after each reaction, washed with methanol and dried completely for the next cycle.

### **Synthesis of aziridines**

At first, liquid bromine (0.2 mol) is added to dried dichloromethane (40 mL). At 0 °C, the mixture above was dropwise added to a mixture which consists of 0.2 mol dimethyl sulfide and 40 mL dichloromethane. Orange solid A was obtained after reacting for 12 h. Then A is washed with ethyl ether. Afterwards, 160 mmol styrene was dropwise added into a round-bottom flask containing 160 mL acetonitrile and 160 mmol A at 0 °C. White solid B was obtained after reacting for 12 h and washing with acetonitrile and drying. At last, different amines (20-50 mmol) were added to the aqueous solution containing 10 mmol B. After reacting for 12 h at room temperature, 20 mL saturated NaCl solution was added and extracted with diethyl ether (3×20 mL)

three times. The organic phase was dried by anhydrous  $\text{MgSO}_4$  overnight. The substrates were obtained by rotary evaporation.

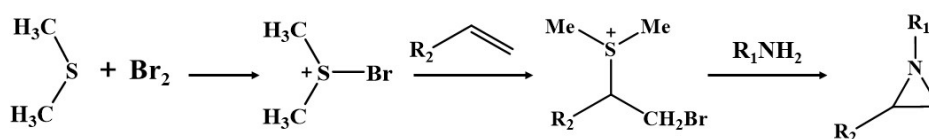

**Scheme S1** Synthesis of aziridines.

**Table S1** Selected bond lengths (Å) and angles (°) for cluster **1<sup>a</sup>**

| <b>Bond lengths</b> |            |                     |            |
|---------------------|------------|---------------------|------------|
| Nd(3)-O(7)          | 2.355(5)   | Nd(3)-O(23)#1       | 2.572(5)   |
| Nd(3)-O(20)         | 2.554(6)   | Nd(3)-O(4)          | 2.454(5)   |
| Nd(3)-O(9)          | 2.381(5)   | Nd(3)-O(19)         | 2.552(5)   |
| Nd(3)-O(8)          | 2.559(5)   | Nd(3)-O(12)         | 2.537(5)   |
| Nd(3)-N(3)          | 2.676(6)   | Nd(3)-N(7)          | 2.987(7)   |
| Nd(2)-O(7)          | 2.320(5)   | Nd(2)-O(23)#1       | 2.916(5)   |
| Nd(2)-O(16)         | 2.576(6)   | Nd(2)-O(4)          | 2.572(5)   |
| Nd(2)-O(3)          | 2.303(6)   | Nd(2)-O(6)          | 2.534(6)   |
| Nd(2)-O(24)#1       | 2.543(5)   | Nd(2)-N(2)          | 2.716(7)   |
| Nd(2)-O(17)         | 2.966(8)   | Nd(2)-O(5)          | 2.516(6)   |
| Nd(4)-O(23)#1       | 2.685(5)   | Nd(4)-O(22)#1       | 2.487(5)   |
| Nd(4)-O(22)         | 2.502(5)   | Nd(4)-N(4)          | 2.653(8)   |
| Nd(4)-O(1)          | 2.326(5)   | Nd(4)-O(9)          | 2.395(5)   |
| Nd(4)-O(12)         | 2.470(5)   | Nd(4)-O(11)         | 2.559(5)   |
| Nd(4)-O(10)         | 2.607(5)   | Nd(1)-O(23)#1       | 2.572(5)   |
| Nd(1)-O(14)         | 2.572(6)   | Nd(1)-O(4)          | 2.474(5)   |
| Nd(1)-O(3)          | 2.365(6)   | Nd(1)-O(1)          | 2.354(5)   |
| Nd(1)-O(13)         | 2.577(5)   | Nd(1)-O(2)          | 2.521(6)   |
| Nd(1)-O(12)         | 2.552(5)   | Nd(1)-N(5)          | 2.991(7)   |
| Nd(1)-N(1)          | 2.684(7)   |                     |            |
| <b>Bond Angles</b>  |            |                     |            |
| O(7)-Nd(3)-O(23)#1  | 70.96(16)  | O(7)-Nd(3)-O(20)    | 147.03(19) |
| O(7)-Nd(3)-O(4)     | 71.17(17)  | O(7)-Nd(3)-O(9)     | 107.25(18) |
| O(7)-Nd(3)-O(19)    | 129.15(18) | O(7)-Nd(3)-O(8)     | 80.99(19)  |
| O(7)-Nd(3)-O(12)    | 130.76(17) | O(7)-Nd(3)-N(3)     | 67.52(19)  |
| O(7)-Nd(3)-N(7)     | 143.52(18) | O(23)#1-Nd(3)-N(3)  | 107.02(18) |
| O(23)#1-Nd(3)-N(7)  | 139.90(17) | O(20)-Nd(3)-O(23)#1 | 139.77(17) |

---

|                     |            |                       |            |
|---------------------|------------|-----------------------|------------|
| O(20)-Nd(3)-O(8)    | 68.48(19)  | O(20)-Nd(3)-N(3)      | 87.5(2)    |
| O(20)-Nd(3)-N(7)    | 25.09(19)  | O(4)-Nd(3)-O(23)#1    | 63.50(16)  |
| O(4)-Nd(3)-O(20)    | 127.11(18) | O(4)-Nd(3)-O(19)      | 78.12(18)  |
| O(4)-Nd(3)-O(8)     | 103.96(18) | O(4)-Nd(3)-O(12)      | 76.43(16)  |
| O(4)-Nd(3)-N(3)     | 138.26(18) | O(4)-Nd(3)-N(7)       | 102.61(19) |
| O(9)-Nd(3)-O(23)#1  | 70.68(17)  | O(9)-Nd(3)-O(20)      | 81.10(18)  |
| O(9)-Nd(3)-O(4)     | 131.96(17) | O(9)-Nd(3)-O(19)      | 123.37(18) |
| O(9)-Nd(3)-O(8)     | 123.57(19) | O(9)-Nd(3)-O(12)      | 69.67(17)  |
| O(9)-Nd(3)-N(3)     | 68.32(19)  | O(9)-Nd(3)-N(7)       | 103.05(19) |
| O(19)-Nd(3)-O(23)#1 | 127.78(17) | O(19)-Nd(3)-O(20)     | 49.84(19)  |
| O(19)-Nd(3)-O(8)    | 68.18(19)  | O(19)-Nd(3)-N(3)      | 125.11(19) |
| O(19)-Nd(3)-N(7)    | 24.76(19)  | O(8)-Nd(3)-O(23)#1    | 151.64(17) |
| O(8)-Nd(3)-N(3)     | 64.1(2)    | O(8)-Nd(3)-N(7)       | 65.35(19)  |
| O(12)-Nd(3)-O(23)#1 | 61.63(15)  | O(12)-Nd(3)-O(20)     | 82.20(18)  |
| O(12)-Nd(3)-O(19)   | 76.48(17)  | O(12)-Nd(3)-O(8)      | 143.54(17) |
| O(12)-Nd(3)-N(3)    | 137.79(18) | O(12)-Nd(3)-N(7)      | 78.84(17)  |
| O(7)-Nd(2)-O(23)#1  | 65.20(16)  | O(7)-Nd(2)-O(16)      | 94.7(2)    |
| O(7)-Nd(2)-O(4)     | 69.60(17)  | O(7)-Nd(2)-O(6)       | 74.4(2)    |
| O(7)-Nd(2)-O(24)#1  | 76.56(19)  | O(7)-Nd(2)-N(2)       | 94.8(2)    |
| O(7)-Nd(2)-O(17)    | 127.70(19) | O(7)-Nd(2)-O(5)       | 149.4(2)   |
| O(23)#1-Nd(2)-O(17) | 99.20(18)  | O(16)-Nd(2)-O(23)#1   | 114.44(16) |
| O(16)-Nd(2)-N(2)    | 119.6(2)   | O(16)-Nd(2)-O(17)     | 44.35(19)  |
| O(4)-Nd(2)-O(23)#1  | 57.24(14)  | O(4)-Nd(2)-O(16)      | 164.07(19) |
| O(4)-Nd(2)-N(2)     | 66.37(18)  | O(4)-Nd(2)-O(17)      | 144.86(18) |
| O(3)-Nd(2)-O(7)     | 128.36(19) | O(3)-Nd(2)-O(23)#1    | 66.13(18)  |
| O(3)-Nd(2)-O(16)    | 120.5(2)   | O(3)-Nd(2)-O(4)       | 70.47(19)  |
| O(3)-Nd(2)-O(6)     | 154.0(2)   | O(3)-Nd(2)-O(24)#1    | 83.4(2)    |
| O(3)-Nd(2)-N(2)     | 97.9(2)    | O(3)-Nd(2)-O(17)      | 76.2(2)    |
| O(3)-Nd(2)-O(5)     | 78.3(2)    | O(6)-Nd(2)-O(23)#1    | 139.08(19) |
| O(6)-Nd(2)-O(16)    | 61.35(19)  | O(6)-Nd(2)-O(4)       | 114.57(18) |
| O(6)-Nd(2)-O(24)#1  | 117.5(2)   | O(6)-Nd(2)-N(2)       | 64.5(2)    |
| O(6)-Nd(2)-O(17)    | 100.3(2)   | O(24)#1-Nd(2)-O(23)#1 | 47.66(15)  |
| O(24)#1-Nd(2)-O(16) | 67.50(18)  | O(24)#1-Nd(2)-O(4)    | 104.77(16) |
| O(24)#1-Nd(2)-N(2)  | 169.7(2)   | O(24)#1-Nd(2)-O(17)   | 59.77(19)  |
| N(2)-Nd(2)-O(23)#1  | 123.58(18) | N(2)-Nd(2)-O(17)      | 130.5(2)   |
| O(5)-Nd(2)-O(23)#1  | 144.2(2)   | O(5)-Nd(2)-O(16)      | 79.8(2)    |
| O(5)-Nd(2)-O(4)     | 115.00(19) | O(5)-Nd(2)-O(6)       | 76.7(3)    |

---

|                     |            |                       |            |
|---------------------|------------|-----------------------|------------|
| O(5)-Nd(2)-O(24)#1  | 126.7(2)   | O(5)-Nd(2)-N(2)       | 63.4(2)    |
| O(5)-Nd(2)-O(17)    | 67.3(2)    | O(22)#1-Nd(4)-O(23)#1 | 50.49(15)  |
| O(22)-Nd(4)-O(23)#1 | 110.18(15) | O(22)#1-Nd(4)-O(22)   | 61.26(18)  |
| O(22)-Nd(4)-N(4)    | 120.00(19) | O(22)#1-Nd(4)-N(4)    | 171.9(2)   |
| O(22)-Nd(4)-O(11)   | 67.61(17)  | O(22)#1-Nd(4)-O(11)   | 123.07(18) |
| O(22)-Nd(4)-O(10)   | 70.23(17)  | O(22)#1-Nd(4)-O(10)   | 108.01(18) |
| N(4)-Nd(4)-O(23)#1  | 129.70(19) | O(1)-Nd(4)-O(23)#1    | 69.48(16)  |
| O(1)-Nd(4)-O(22)#1  | 87.64(18)  | O(1)-Nd(4)-O(22)      | 96.80(18)  |
| O(1)-Nd(4)-N(4)     | 100.0(2)   | O(1)-Nd(4)-O(9)       | 133.42(17) |
| O(1)-Nd(4)-O(12)    | 72.03(18)  | O(1)-Nd(4)-O(11)      | 74.85(19)  |
| O(1)-Nd(4)-O(10)    | 149.54(18) | O(9)-Nd(4)-O(23)#1    | 68.52(16)  |
| O(9)-Nd(4)-O(22)    | 115.84(17) | O(9)-Nd(4)-O(22)#1    | 80.92(17)  |
| O(9)-Nd(4)-N(4)     | 91.7(2)    | O(9)-Nd(4)-O(12)      | 70.61(16)  |
| O(9)-Nd(4)-O(11)    | 146.8(2)   | O(9)-Nd(4)-O(10)      | 76.00(17)  |
| O(12)-Nd(4)-O(23)#1 | 60.85(15)  | O(12)-Nd(4)-O(22)#1   | 111.20(15) |
| O(12)-Nd(4)-O(22)   | 167.34(16) | O(12)-Nd(4)-N(4)      | 69.0(2)    |
| O(12)-Nd(4)-O(11)   | 113.59(17) | O(12)-Nd(4)-O(10)     | 122.44(17) |
| O(11)-Nd(4)-O(23)#1 | 143.78(18) | O(11)-Nd(4)-N(4)      | 62.3(2)    |
| O(11)-Nd(4)-O(10)   | 74.71(19)  | O(10)-Nd(4)-O(23)#1   | 140.47(17) |
| O(10)-Nd(4)-N(4)    | 66.6(2)    | O(23)#1-Nd(1)-O(14)   | 138.90(18) |
| O(23)#1-Nd(1)-O(13) | 130.55(17) | O(23)#1-Nd(1)-N(5)    | 142.08(18) |
| O(23)#1-Nd(1)-N(1)  | 106.7(2)   | O(14)-Nd(1)-O(13)     | 49.74(18)  |
| O(14)-Nd(1)-N(5)    | 24.69(19)  | O(14)-Nd(1)-N(1)      | 85.6(2)    |
| O(4)-Nd(1)-O(23)#1  | 63.23(15)  | O(4)-Nd(1)-O(14)      | 130.16(17) |
| O(4)-Nd(1)-O(13)    | 81.56(17)  | O(4)-Nd(1)-O(2)       | 103.64(18) |
| O(4)-Nd(1)-O(12)    | 75.77(16)  | O(4)-Nd(1)-N(5)       | 106.43(18) |
| O(4)-Nd(1)-N(1)     | 137.9(2)   | O(3)-Nd(1)-O(23)#1    | 71.63(18)  |
| O(3)-Nd(1)-O(14)    | 145.76(19) | O(3)-Nd(1)-O(4)       | 71.29(19)  |
| O(3)-Nd(1)-O(13)    | 130.0(2)   | O(3)-Nd(1)-O(2)       | 79.0(2)    |
| O(3)-Nd(1)-O(12)    | 131.03(17) | O(3)-Nd(1)-N(5)       | 142.9(2)   |
| O(3)-Nd(1)-N(1)     | 67.0(2)    | O(1)-Nd(1)-O(23)#1    | 71.14(17)  |
| O(1)-Nd(1)-O(14)    | 78.02(19)  | O(1)-Nd(1)-O(4)       | 132.06(17) |
| O(1)-Nd(1)-O(3)     | 108.1(2)   | O(1)-Nd(1)-O(13)      | 121.14(19) |
| O(1)-Nd(1)-O(2)     | 123.67(19) | O(1)-Nd(1)-O(12)      | 70.11(17)  |
| O(1)-Nd(1)-N(5)     | 100.3(2)   | O(1)-Nd(1)-N(1)       | 68.4(2)    |
| O(13)-Nd(1)-N(5)    | 25.13(18)  | O(13)-Nd(1)-N(1)      | 122.5(2)   |
| O(2)-Nd(1)-O(23)#1  | 150.31(18) | O(2)-Nd(1)-O(14)      | 70.4(2)    |

|                     |           |                   |            |
|---------------------|-----------|-------------------|------------|
| O(2)-Nd(1)-O(13)    | 67.5(2)   | O(2)-Nd(1)-O(12)  | 144.74(19) |
| O(2)-Nd(1)-N(5)     | 65.4(2)   | O(2)-Nd(1)-N(1)   | 63.9(2)    |
| O(12)-Nd(1)-O(23)#1 | 61.42(15) | O(12)-Nd(1)-O(14) | 83.08(18)  |
| O(12)-Nd(1)-O(13)   | 77.67(17) | O(12)-Nd(1)-N(5)  | 80.80(18)  |
| O(12)-Nd(1)-N(1)    | 138.3(2)  |                   |            |

<sup>a</sup> Symmetry transformations used to generate equivalent atoms: #1 -x+1, -y+2, -z+1

**Table S2** Selected bond lengths (Å) and angles (°) for cluster **2<sup>a</sup>**

| <b>Bond lengths</b> |            |                  |           |
|---------------------|------------|------------------|-----------|
| Sm(2)-O(15)         | 2.538(6)   | Sm(2)-O(5)       | 2.333(6)  |
| Sm(2)-O(4)          | 2.370(6)   | Sm(2)-O(23)      | 2.537(6)  |
| Sm(2)-O(10)         | 2.427(6)   | Sm(2)-O(22)      | 2.524(7)  |
| Sm(2)-O(6)          | 2.548(6)   | Sm(2)-N(2)       | 2.662(8)  |
| Sm(2)-N(8)          | 2.956(8)   | Sm(2)-O(2)       | 2.505(6)  |
| Sm(4)-O(15)         | 2.913(6)   | Sm(4)-O(5)       | 2.294(6)  |
| Sm(4)-O(10)         | 2.567(6)   | Sm(4)-O(11)      | 2.520(7)  |
| Sm(4)-O(12)         | 2.490(8)   | Sm(4)-O(18)      | 2.541(7)  |
| Sm(4)-N(4)          | 2.707(8)   | Sm(4)-O(14)      | 2.526(6)  |
| Sm(4)-O(8)          | 2.281(7)   | Sm(1)-O(15)      | 2.652(6)  |
| Sm(1)-O(4)          | Sm(1)-O(4) | Sm(1)-O(7)       | 2.307(7)  |
| Sm(1)-O(13)         | 2.478(6)   | Sm(1)-O(13)#1    | 2.485(6)  |
| Sm(1)-O(3)          | 2.535(7)   | Sm(1)-O(1)       | 2.569(7)  |
| Sm(1)-O(2)          | 2.465(6)   | Sm(1)-N(1)       | 2.623(10) |
| Sm(3)-O(15)         | 2.537(6)   | Sm(3)-O(20)      | 2.539(7)  |
| Sm(3)-O(10)         | 2.449(6)   | Sm(3)-O(7)       | 2.330(6)  |
| Sm(3)-O(19)         | 2.556(6)   | Sm(3)-O(9)       | 2.507(7)  |
| Sm(3)-N(7)          | 2.970(8)   | Sm(3)-N(3)       | 2.667(9)  |
| Sm(3)-O(2)          | 2.525(6)   | Sm(3)-O(8)       | 2.355(7)  |
| <b>Bond Angles</b>  |            |                  |           |
| O(15)-Sm(2)-O(6)    | 151.3(2)   | O(15)-Sm(2)-N(2) | 107.6(2)  |
| O(15)-Sm(2)-N(8)    | 140.2(2)   | O(5)-Sm(2)-O(15) | 71.2(2)   |
| O(5)-Sm(2)-O(4)     | 107.5(2)   | O(5)-Sm(2)-O(23) | 129.1(2)  |
| O(5)-Sm(2)-O(10)    | 71.8(2)    | O(5)-Sm(2)-O(22) | 146.3(2)  |
| O(5)-Sm(2)-O(6)     | 80.5(2)    | O(5)-Sm(2)-N(2)  | 67.8(2)   |
| O(5)-Sm(2)-N(8)     | 143.3(2)   | O(5)-Sm(2)-O(2)  | 131.1(2)  |
| O(4)-Sm(2)-O(15)    | 70.9(2)    | O(4)-Sm(2)-O(23) | 123.1(2)  |
| O(4)-Sm(2)-O(10)    | 132.7(2)   | O(4)-Sm(2)-O(22) | 80.3(2)   |

---

|                    |            |                    |           |
|--------------------|------------|--------------------|-----------|
| O(4)-Sm(2)-O(6)    | 124.3(2)   | O(4)-Sm(2)-N(2)    | 68.5(2)   |
| O(4)-Sm(2)-N(8)    | 102.6(2)   | O(4)-Sm(2)-O(2)    | 70.1(2)   |
| O(23)-Sm(2)-O(15)  | 128.0(2)   | O(23)-Sm(2)-O(6)   | 67.7(2)   |
| O(23)-Sm(2)-N(2)   | 124.3(2)   | O(23)-Sm(2)-N(8)   | 25.0(2)   |
| O(10)-Sm(2)-O(15)  | 64.21(19)  | O(10)-Sm(2)-O(23)  | 77.5(2)   |
| O(10)-Sm(2)-O(22)  | 127.2(2)   | O(10)-Sm(2)-O(6)   | 102.6(2)  |
| O(10)-Sm(2)-N(2)   | 139.0(2)   | O(10)-Sm(2)-N(8)   | 102.3(2)  |
| O(10)-Sm(2)-O(2)   | 76.17(19)  | O(22)-Sm(2)-O(15)  | 139.9(2)  |
| O(22)-Sm(2)-O(23)  | 50.5(2)    | O(22)-Sm(2)-O(6)   | 68.8(2)   |
| O(22)-Sm(2)-N(2)   | 86.1(2)    | O(22)-Sm(2)-N(8)   | 25.5(2)   |
| O(6)-Sm(2)-N(2)    | 64.4(2)    | O(6)-Sm(2)-N(8)    | 65.2(2)   |
| N(2)-Sm(2)-N(8)    | 105.7(3)   | O(2)-Sm(2)-O(15)   | 61.86(18) |
| O(2)-Sm(2)-O(23)   | 76.2(2)    | O(2)-Sm(2)-O(22)   | 82.6(2)   |
| O(2)-Sm(2)-O(6)    | 143.1(2)   | O(2)-Sm(2)-N(2)    | 138.3(2)  |
| O(2)-Sm(2)-N(8)    | 78.8(2)    | O(5)-Sm(4)-O(15)   | 64.84(19) |
| O(5)-Sm(4)-O(10)   | 69.9(2)    | O(5)-Sm(4)-O(11)   | 75.1(2)   |
| O(5)-Sm(4)-O(12)   | 150.3(3)   | O(5)-Sm(4)-O(18)   | 95.2(3)   |
| O(5)-Sm(4)-N(4)    | 95.8(3)    | O(5)-Sm(4)-O(14)   | 76.8(2)   |
| O(10)-Sm(4)-O(15)  | 57.20(16)  | O(10)-Sm(4)-N(4)   | 67.1(2)   |
| O(11)-Sm(4)-O(15)  | 139.3(2)   | O(11)-Sm(4)-O(10)  | 115.6(2)  |
| O(11)-Sm(4)-O(18)  | 61.3(2)    | O(11)-Sm(4)-N(4)   | 65.0(3)   |
| O(11)-Sm(4)-O(14)  | 117.5(2)   | O(12)-Sm(4)-O(15)  | 144.2(3)  |
| O(12)-Sm(4)-O(10)  | 116.3(2)   | O(12)-Sm(4)-O(11)  | 76.5(3)   |
| O(12)-Sm(4)-O(18)  | 78.4(3)    | O(12)-Sm(4)-N(4)   | 64.1(3)   |
| O(12)-Sm(4)-O(14)  | 124.8(3)   | O(18)-Sm(4)-O(15)  | 114.1(2)  |
| O(18)-Sm(4)-O(10)  | 164.7(2)   | O(18)-Sm(4)-N(4)   | 119.7(2)  |
| N(4)-Sm(4)-O(15)   | 124.2(2)   | O(14)-Sm(4)-O(15)  | 47.57(18) |
| O(14)-Sm(4)-O(10)  | 104.70(18) | O(14)-Sm(4)-O(18)  | 67.2(2)   |
| O(14)-Sm(4)-N(4)   | 170.7(2)   | O(8)-Sm(4)-O(15)   | 65.9(2)   |
| O(8)-Sm(4)-O(5)    | 128.2(2)   | O(8)-Sm(4)-O(10)   | 71.0(2)   |
| O(8)-Sm(4)-O(11)   | 154.5(3)   | O(8)-Sm(4)-O(12)   | 78.6(3)   |
| O(8)-Sm(4)-O(18)   | 118.7(3)   | O(8)-Sm(4)-N(4)    | 98.8(3)   |
| O(8)-Sm(4)-O(14)   | 81.8(3)    | O(4)-Sm(1)-O(15)   | 68.90(19) |
| O(4)-Sm(1)-O(13)#1 | 116.3(2)   | O(4)-Sm(1)-O(13)   | 81.7(2)   |
| O(4)-Sm(1)-O(3)    | 146.7(3)   | O(4)-Sm(1)-O(1)    | 76.1(2)   |
| O(4)-Sm(1)-O(2)    | 70.8(2)    | O(7)-Sm(1)-O(15)   | 69.5(2)   |
| O(7)-Sm(1)-O(4)    | 133.8(2)   | O(7)-Sm(1)-O(13)#1 | 96.2(2)   |

---

|                    |            |                     |            |
|--------------------|------------|---------------------|------------|
| O(7)-Sm(1)-O(13)   | 87.6(2)    | O(7)-Sm(1)-O(3)     | 74.4(2)    |
| O(7)-Sm(1)-O(1)    | 149.1(2)   | O(7)-Sm(1)-O(2)     | 71.9(2)    |
| O(7)-Sm(1)-N(1)    | 99.8(3)    | O(13)#1-Sm(1)-O(15) | 110.06(18) |
| O(13)-Sm(1)-O(15)  | 50.99(18)  | O(13)-Sm(1)-O(13)#1 | 60.7(2)    |
| O(13)#1-Sm(1)-O(3) | 67.6(2)    | O(13)-Sm(1)-O(3)    | 122.5(2)   |
| O(13)-Sm(1)-O(1)   | 107.7(2)   | O(13)#1-Sm(1)-O(1)  | 70.2(2)    |
| O(13)-Sm(1)-N(1)   | 172.2(3)   | O(13)#1-Sm(1)-N(1)  | 120.4(2)   |
| O(3)-Sm(1)-O(15)   | 143.4(2)   | O(3)-Sm(1)-O(1)     | 74.8(2)    |
| O(3)-Sm(1)-N(1)    | 62.6(3)    | O(1)-Sm(1)-O(15)    | 140.8(2)   |
| O(1)-Sm(1)-N(1)    | 67.0(3)    | O(2)-Sm(1)-O(15)    | 60.74(18)  |
| O(2)-Sm(1)-O(13)   | 111.62(18) | O(2)-Sm(1)-O(13)#1  | 166.7(2)   |
| O(2)-Sm(1)-O(3)    | 113.3(2)   | O(2)-Sm(1)-O(1)     | 123.1(2)   |
| O(2)-Sm(1)-N(1)    | 68.8(2)    | N(1)-Sm(1)-O(15)    | 129.4(2)   |
| O(15)-Sm(3)-O(20)  | 139.0(2)   | O(15)-Sm(3)-O(19)   | 130.3(2)   |
| O(15)-Sm(3)-N(7)   | 142.1(2)   | O(15)-Sm(3)-N(3)    | 107.5(2)   |
| O(20)-Sm(3)-O(19)  | 50.1(2)    | O(20)-Sm(3)-N(7)    | 25.1(2)    |
| O(20)-Sm(3)-N(3)   | 84.6(3)    | O(10)-Sm(3)-O(15)   | 63.94(19)  |
| O(10)-Sm(3)-O(20)  | 129.8(2)   | O(10)-Sm(3)-O(19)   | 80.6(2)    |
| O(10)-Sm(3)-O(9)   | 101.9(2)   | O(10)-Sm(3)-N(7)    | 105.6(2)   |
| O(10)-Sm(3)-N(3)   | 138.7(3)   | O(10)-Sm(3)-O(2)    | 75.42(19)  |
| O(7)-Sm(3)-O(15)   | 71.2(2)    | O(7)-Sm(3)-O(20)    | 77.7(2)    |
| O(7)-Sm(3)-O(10)   | 132.7(2)   | O(7)-Sm(3)-O(19)    | 120.9(2)   |
| O(7)-Sm(3)-O(9)    | 125.0(2)   | O(7)-Sm(3)-N(7)     | 100.2(2)   |
| O(7)-Sm(3)-N(3)    | 68.7(3)    | O(7)-Sm(3)-O(2)     | 70.4(2)    |
| O(7)-Sm(3)-O(8)    | 108.3(2)   | O(19)-Sm(3)-N(7)    | 25.2(2)    |
| O(19)-Sm(3)-N(3)   | 122.0(3)   | O(9)-Sm(3)-O(15)    | 149.8(2)   |
| O(9)-Sm(3)-O(20)   | 70.9(3)    | O(9)-Sm(3)-O(19)    | 67.2(2)    |
| O(9)-Sm(3)-N(7)    | 65.3(3)    | O(9)-Sm(3)-N(3)     | 64.5(3)    |
| O(9)-Sm(3)-O(2)    | 144.0(2)   | O(2)-Sm(3)-O(15)    | 61.60(18)  |
| O(2)-Sm(3)-O(20)   | 83.3(2)    | O(2)-Sm(3)-O(19)    | 77.1(2)    |
| O(2)-Sm(3)-N(7)    | 80.7(2)    | O(2)-Sm(3)-N(3)     | 138.9(2)   |
| O(8)-Sm(3)-O(15)   | 71.9(2)    | O(8)-Sm(3)-O(20)    | 145.2(2)   |
| O(8)-Sm(3)-O(10)   | 72.0(2)    | O(8)-Sm(3)-O(19)    | 130.0(2)   |
| O(8)-Sm(3)-O(9)    | 78.5(3)    | O(8)-Sm(3)-N(7)     | 142.6(3)   |
| O(8)-Sm(3)-N(3)    | 67.2(3)    | O(8)-Sm(3)-O(2)     | 131.3(2)   |

<sup>a</sup> Symmetry transformations used to generate equivalent atoms: #1 -x+1, -y+1, -z+1



**Table S3** The geometry analysis by SHAPE 2.0 for clusters **1** and **2**.

|                    |                             |                            |                             |                            |                         |
|--------------------|-----------------------------|----------------------------|-----------------------------|----------------------------|-------------------------|
| Nd1 <sup>III</sup> | <b>C<sub>4v</sub>JCSAPR</b> | <b>C<sub>4v</sub>CSAPR</b> | <b>D<sub>3h</sub>JTCTPR</b> | <b>D<sub>3h</sub>TCTPR</b> | <b>C<sub>s</sub>MFF</b> |
|                    | 2.846                       | 1.841                      | 4.071                       | 1.885                      | 2.460                   |
| Nd2 <sup>III</sup> | <b>O<sub>h</sub>CU</b>      | <b>D<sub>4d</sub>SAPR</b>  | <b>D<sub>2d</sub>TDD</b>    | <b>C<sub>2v</sub>BTPR</b>  | <b>T<sub>d</sub>TT</b>  |
|                    | 3.375                       | 5.208                      | 3.019                       | 5.051                      | 4.106                   |
| Nd3 <sup>III</sup> | <b>C<sub>4v</sub>JCSAPR</b> | <b>C<sub>4v</sub>CSAPR</b> | <b>D<sub>3h</sub>JTCTPR</b> | <b>D<sub>3h</sub>TCTPR</b> | <b>C<sub>s</sub>MFF</b> |
|                    | 2.895                       | 1.955                      | 4.115                       | 2.052                      | 2.579                   |
| Nd4 <sup>III</sup> | <b>C<sub>4v</sub>JCCU</b>   | <b>C<sub>4v</sub>CCU</b>   | <b>C<sub>4v</sub>CSAPR</b>  | <b>C<sub>2v</sub>HH</b>    | <b>C<sub>s</sub>MFF</b> |
|                    | 3.877                       | 3.588                      | 7.691                       | 3.831                      | 5.968                   |
| Sm1 <sup>III</sup> | <b>C<sub>4v</sub>JCCU</b>   | <b>C<sub>4v</sub>CCU</b>   | <b>C<sub>4v</sub>CSAPR</b>  | <b>C<sub>2v</sub>HH</b>    | <b>C<sub>s</sub>MFF</b> |
|                    | 3.962                       | 3.611                      | 7.578                       | 3.833                      | 5.857                   |
| Sm2 <sup>III</sup> | <b>C<sub>4v</sub>JCSAPR</b> | <b>C<sub>4v</sub>CSAPR</b> | <b>D<sub>3h</sub>JTCTPR</b> | <b>D<sub>3h</sub>TCTPR</b> | <b>C<sub>s</sub>MFF</b> |
|                    | 2.685                       | 1.766                      | 3.910                       | 1.901                      | 2.452                   |
| Sm3 <sup>III</sup> | <b>C<sub>4v</sub>JCSAPR</b> | <b>C<sub>4v</sub>CSAPR</b> | <b>D<sub>3h</sub>JTCTPR</b> | <b>D<sub>3h</sub>TCTPR</b> | <b>C<sub>s</sub>MFF</b> |
|                    | 2.644                       | 1.658                      | 3.876                       | 1.761                      | 2.237                   |
| Sm4 <sup>III</sup> | <b>O<sub>h</sub>Cube</b>    | <b>D<sub>4d</sub>SAPR</b>  | <b>D<sub>2d</sub>TDD</b>    | <b>C<sub>2v</sub>BTPR</b>  | <b>T<sub>d</sub>TT</b>  |
|                    | 3.268                       | 5.181                      | 2.949                       | 5.175                      | 3.984                   |

**JCSAPR-9**=Capped square antiprism J10; **CSAPR-9**=Spherical capped square antiprism; **JTCTPR-9**=Tricapped trigonal prism J51; **TCTPR-9**=Spherical tricapped trigonal prism; **MFF-9**=Muffin; **JCCU-9**=Capped cube J8; **CCU-9**=Spherical-relaxed capped cube; **HH-9**=Hula-hoop. **CU-8**=Cube; **SAPR-8** = Square antiprism; **TDD-8** = Triangular dodecahedron; **BTPR-8** = Biaugmented trigonal prism; **TT-8**=Triakis tetrahedron.

**Table S4** Reported Ln-based complexes as catalysts for the cycloaddition reactions of CO<sub>2</sub> with 1-ethyl-2-phenylaziridine under mild conditions.

| Cat. (%)                                                                                                                                                               | Co-cat.               | P <sub>CO<sub>2</sub></sub> / MPa | T / °C | Tim e / h | Y / % | Ref       |
|------------------------------------------------------------------------------------------------------------------------------------------------------------------------|-----------------------|-----------------------------------|--------|-----------|-------|-----------|
| {[Cu <sub>2</sub> (BCP)(H <sub>2</sub> O) <sub>2</sub> ]·3DMF} <sub>n</sub>                                                                                            | TBAB                  | 2                                 | 100    | 12        | >99   | 1         |
| Zn-MOF                                                                                                                                                                 | TBAB                  | 2                                 | 70     | 12        | >99   | 2         |
| {Cu <sub>4</sub> (CuTBCPPP)(H <sub>2</sub> O) <sub>4</sub> } <sub>n</sub>                                                                                              | TBAB                  | 2                                 | 100    | 10        | >99   | 3         |
| {[NH <sub>2</sub> (CH <sub>3</sub> ) <sub>2</sub> ][In(CPT) <sub>2</sub> ]·3CH <sub>3</sub> CN·3DMA} <sub>n</sub>                                                      | TBAB                  | 2                                 | 70     | 10        | 99    | 4         |
| {[Cu <sub>2</sub> (L <sub>4</sub> <sup>-</sup> )(H <sub>2</sub> O) <sub>2</sub> ]·3DMF·2H <sub>2</sub> O} <sub>n</sub>                                                 | TBAB                  | 0.5                               | 60     | 12        | 98    | 5         |
| {[Ni(DCTP)]·6.5DMF} <sub>n</sub>                                                                                                                                       | TBAB                  | 2                                 | 70     | 10        | 95    | 6         |
| {[Zn(H <sub>2</sub> O)(C <sub>5</sub> H <sub>7</sub> NO <sub>4</sub> )]·H <sub>2</sub> O} <sub>n</sub>                                                                 | TBAB/H <sub>2</sub> O | 1                                 | r.t.   | 24        | 94    | 7         |
| {[H <sub>2</sub> N(CH <sub>3</sub> ) <sub>2</sub> ] <sub>3</sub> [Zn <sub>3</sub> (BTB) <sub>2</sub> (5-atz) <sub>3</sub> ]·3EtOH·3H <sub>2</sub> O·3DMF} <sub>n</sub> | TBAB                  | 1                                 | 70     | 10        | 94    | 8         |
| {[Co <sub>2</sub> (XN) <sub>2</sub> (IPA) <sub>2</sub> ]·2H <sub>2</sub> O} <sub>n</sub>                                                                               | TBAB                  | 1                                 | 30     | 10        | 89    | 9         |
| Cluster <b>1</b>                                                                                                                                                       | TBAB                  | 1                                 | 70     | 10        | 94    | This Work |
| Cluster <b>2</b>                                                                                                                                                       | TBAB                  | 1                                 | 70     | 10        | 92    | This Work |

**Table S5** Reported Ln-based complexes as catalysts for the cycloaddition reactions of CO<sub>2</sub> with styrene oxide under mild conditions.

| Cat. (%) | Co-cat. | P <sub>CO<sub>2</sub></sub> | T / °C | Tim e / h | Y / % | Ref |
|----------|---------|-----------------------------|--------|-----------|-------|-----|
|----------|---------|-----------------------------|--------|-----------|-------|-----|

|                                                                                                                                                                                 |      | /bar | °C  | e / h |     |           |
|---------------------------------------------------------------------------------------------------------------------------------------------------------------------------------|------|------|-----|-------|-----|-----------|
| $\{\text{Eu}(\text{BTB})(\text{phen})\} \cdot 4.5\text{DMF} \cdot 2\text{H}_2\text{O}\}_n$                                                                                      | TBAB | 1    | 80  | 12    | 68  | 10        |
| 3d-4f MOF                                                                                                                                                                       | TBAB | 1    | 70  | 12    | 77  | 11        |
| $\text{Zn}^{\text{II}}_2\text{Nd}^{\text{III}}_2\text{L}_4$                                                                                                                     | TBAB | 1    | 80  | 14    | 88  | 12        |
| Tb-BDC                                                                                                                                                                          | TBAB | 1    | 60  | 12    | 89  | 13        |
| $\text{Zn}^{\text{II}}_2\text{Yb}^{\text{III}}_2\text{L}_4$                                                                                                                     | TBAB | 1    | 80  | 14    | 90  | 12        |
| Tb <sub>4</sub> MOF                                                                                                                                                             | TBAB | 1    | 60  | 12    | 95  | 14        |
| Yb-mesocate                                                                                                                                                                     | TBAB | 1    | 120 | 2.5   | 95  | 15        |
| $[\text{Dy}_7(\text{CDA})_6(\text{HCOO})_3(\mu_3\text{-OH})_6(\text{H}_2\text{O})_8]_n$                                                                                         | TBAB | 1    | 80  | 12    | 98  | 16        |
| $\{[\text{Ni}_3\text{Th}_6(\mu_3\text{-O})_4(\mu_3\text{-OH})_4(\text{IN})_{12})(\text{H}_2\text{O})_{12}] \cdot (\text{OH})_6 \cdot 5\text{DMF} \cdot 2\text{H}_2\text{O}\}_n$ | TBAB | 1    | 70  | 12    | >99 | 17        |
| Cluster 1                                                                                                                                                                       | TBAB | 1    | 80  | 12    | 97  | This Work |
| Cluster 2                                                                                                                                                                       | TBAB | 1    | 80  | 12    | 96  | This Work |

**Table S6** The ICP results of cluster 1 after recycling (filter liquor).

| Compounds                                           | Nd <sup>3+</sup> |
|-----------------------------------------------------|------------------|
| Cluster 1 after catalytic recycling (filter liquor) | 0.20 %           |

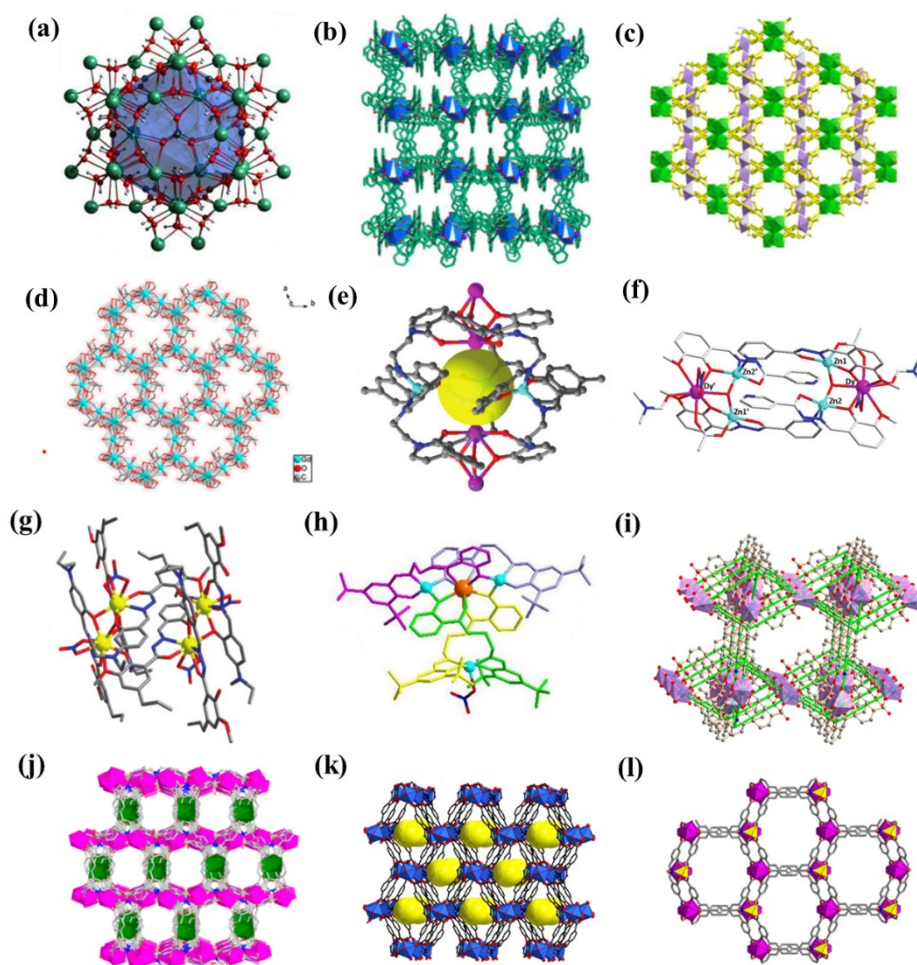

**Fig.S1** The structures of recently reported representative complexes as catalyst for the reaction of CO<sub>2</sub> and epoxides. (a)  $\{[\text{Ln}_3(\mu_6\text{-CO}_3)(\mu_3\text{-OH})_6]\text{OH}\}_n$ ;<sup>18</sup> (b)  $\{[\text{Eu}(\text{BTB})(\text{phen})]\cdot 4.5\text{DMF}\cdot 2\text{H}_2\text{O}\}_n$ ;<sup>10</sup> (c)  $\{[\text{TbZn}(\text{BPDC})_2(\mu_2\text{-H}_2\text{O})\text{Cl}(\text{H}_2\text{O})_3]\cdot 5\text{H}_2\text{O}\cdot 0.5\text{DMA}\}_n$ ;<sup>19</sup> (d)  $[\text{Ln}_7(\text{CDA})_6(\text{HCOO})_3(\mu_3\text{-OH})_6(\text{H}_2\text{O})_8]_n$ ;<sup>16</sup> (e)  $\text{Ln}_4\text{Zn}_3\text{L}_6$ ;<sup>20</sup> (f)  $[\text{Ln}_2\text{Zn}_4(\mu_3\text{-OH})_2\text{L}_4(\text{AcO})_2(\text{NO}_3)_2(\text{DMF})_2]\cdot 2(\text{CH}_3\text{OH})$ ;<sup>21</sup> (g)  $[\text{Ln}_4\text{L}_6(\text{NO}_3)_4]\cdot 4(\text{MeCN})$ ;<sup>22</sup> (h)  $\text{Zn}_3\text{LnL}_4$ ;<sup>23</sup> (i)  $\{(\text{Me}_2\text{NH}_2)[\text{Tm}_3(\text{BDCP})_2(\text{H}_2\text{O})_3]\cdot 4\text{DMF}\cdot \text{H}_2\text{O}\}_n$ ;<sup>24</sup> (j)  $[\text{Tm}_2(\text{BDCP})_2]\cdot 3\text{DMF}\cdot 3\text{H}_2\text{O}\}_n$ ;<sup>25</sup> (k)  $\{[\text{Tb}_4(\text{BDCP})_2(\mu_2\text{-OH})_2]\cdot 3\text{DMF}\cdot 5\text{H}_2\text{O}\}_n$ ;<sup>26</sup> (l)  $\{[\text{CoYb}(\text{BDCP})(\text{H}_2\text{O})]\cdot 3\text{DMF}\cdot 3\text{H}_2\text{O}\}_n$ ;<sup>27</sup>

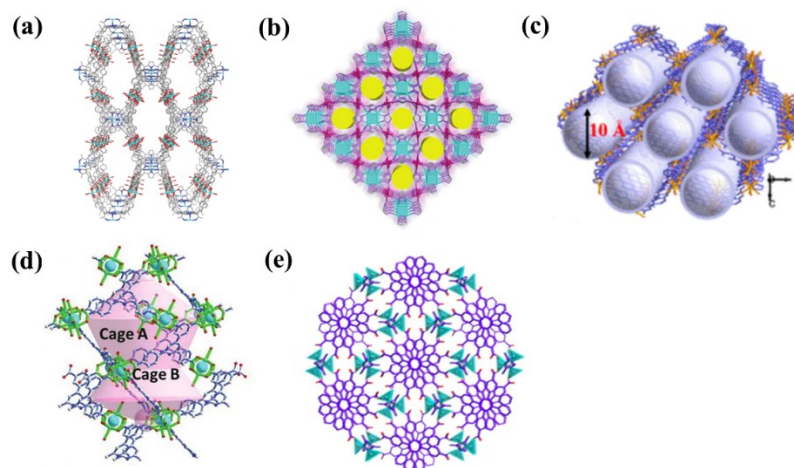

**Fig.S2** The structures of recently reported representative complexes as catalyst for the reaction of CO<sub>2</sub> and aziridines. (a) MMPF-10;<sup>3</sup> (b)  $\{[\text{K}_{1.2}\text{Na}_{2.8}\text{ZnI}_8(\text{HL})_{12}]\cdot 4\text{H}_2\text{O}\}_n$ ;<sup>28</sup> (c)  $\{[\text{Cu}_2(\text{BCP})(\text{H}_2\text{O})_2]\cdot 3\text{DMF}\}_n$ ;<sup>29</sup> (d)  $\{[\text{NH}_2(\text{CH}_3)_2][\text{In}(\text{CPT})_2]\cdot 3\text{CH}_3\text{CN}\cdot 3\text{DMA}\}_n$ ;<sup>4</sup> (e)  $\{[\text{H}_2\text{N}(\text{CH}_3)_2]_3[\text{Zn}_3(\text{BTB})_2(5\text{-atz})_3]\cdot 3\text{EtOH}\cdot 3\text{H}_2\text{O}\cdot 3\text{DMF}\}_n$ .<sup>8</sup>

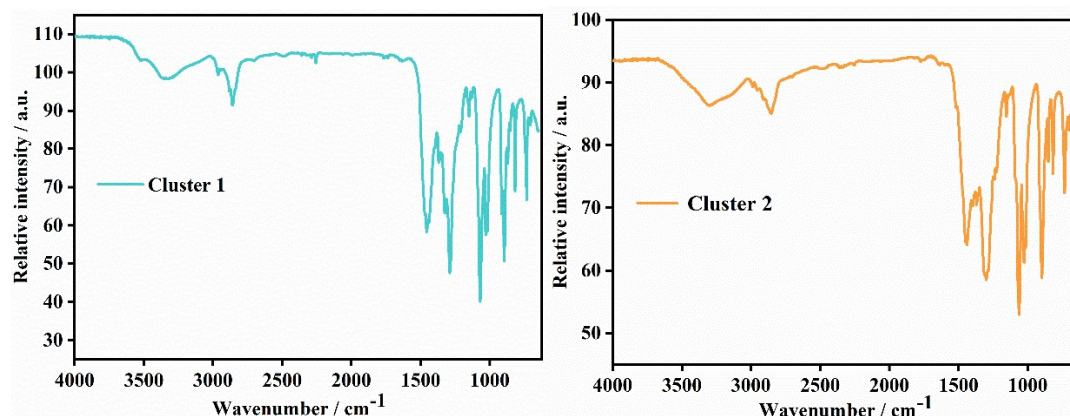

**Fig. S3** The IR spectra clusters 1 and 2.

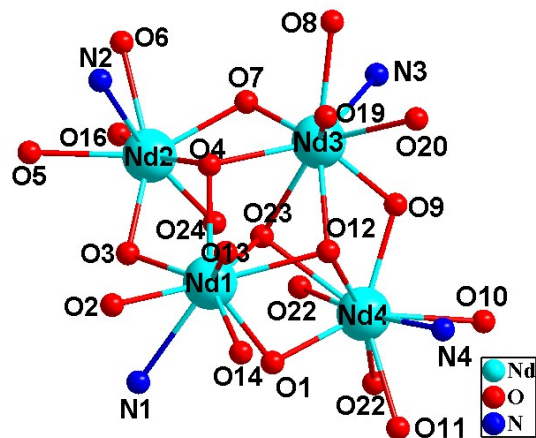

**Fig. S4** The coordinate atom labels of central Nd(III) ions in cluster 1.

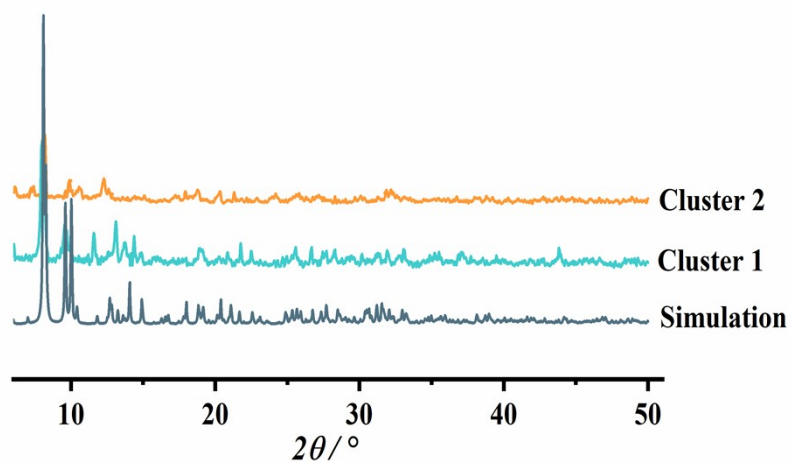

**Fig. S5** The PXRD of clusters 1 and 2.

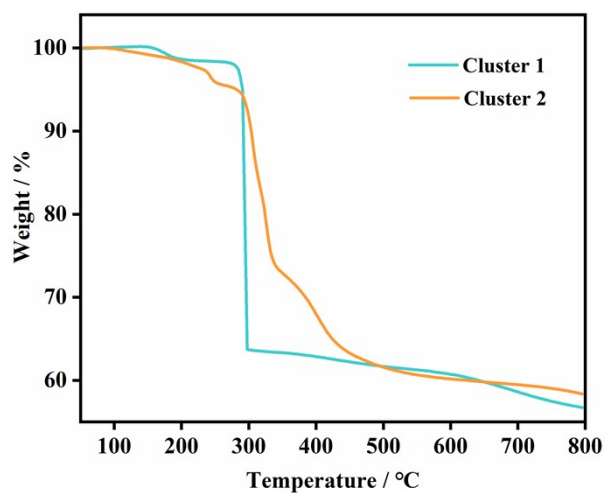

**Fig. S6** The TGA curves of clusters 1 and 2.

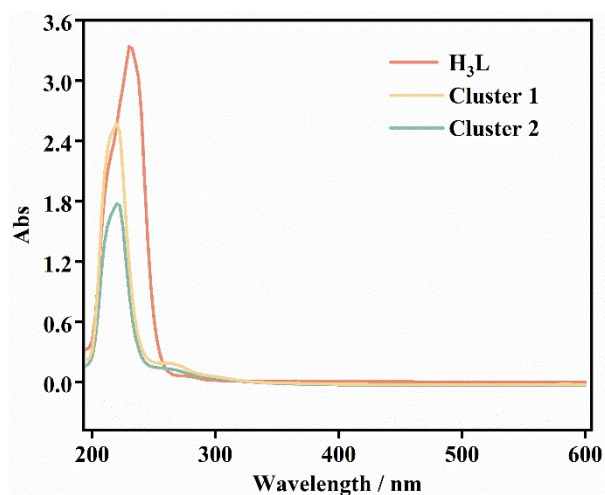

**Fig. S7** The UV-vis spectra of clusters 1, 2 and H<sub>3</sub>L ligand.

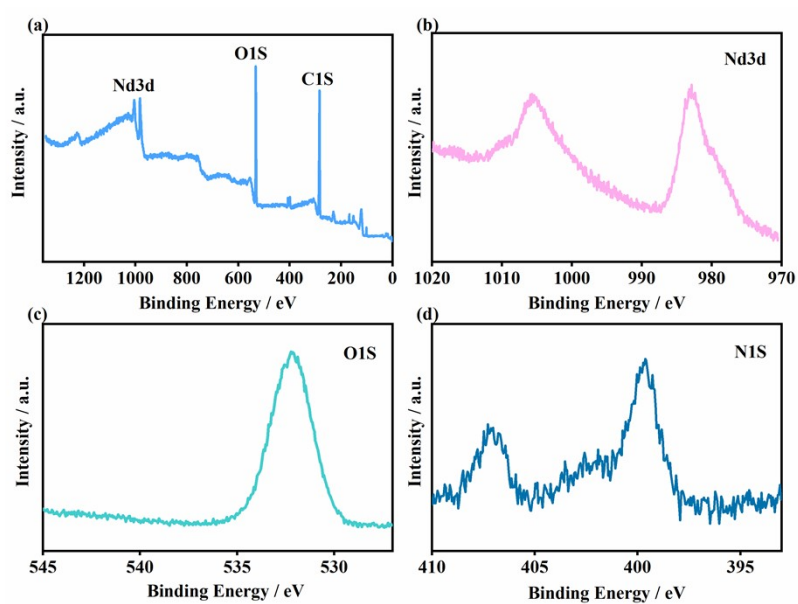

**Fig. S8** XPS spectra of cluster 1. (a) Full spectrum, (b) Nd 4d, (c) O 1s, and (d) N1s spectrum.

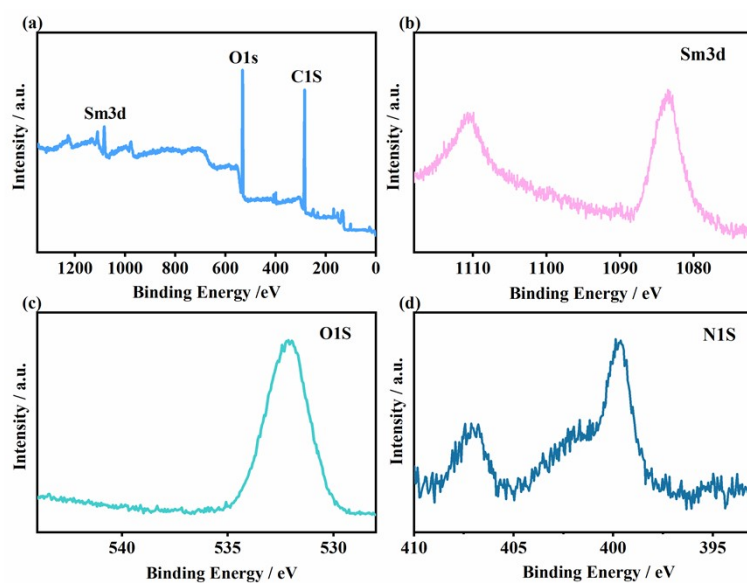

**Fig. S9** XPS spectra of cluster **2**. (a) Full spectrum, (b) Sm 4d, (c) O 1s, and (d) N1s spectrum.

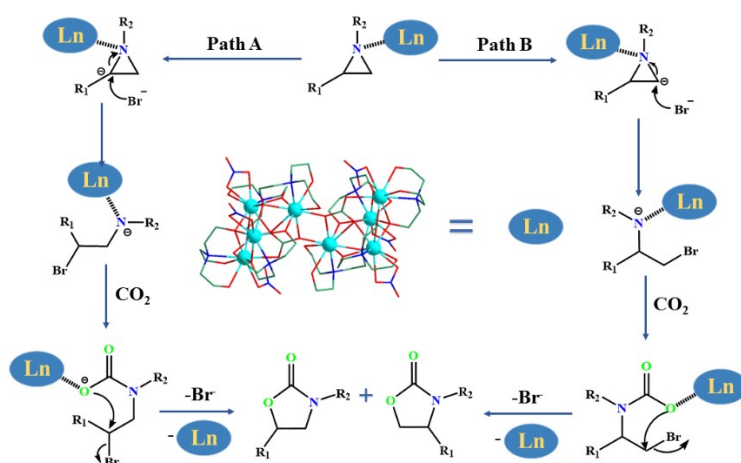

**Fig. S10** A possible mechanism for catalyzed reaction.

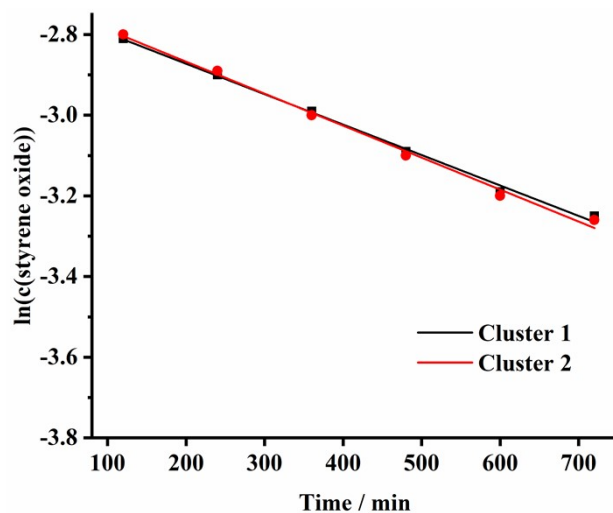

**Fig. S11** The kinetic study for clusters **1** and **2** in the reactions.

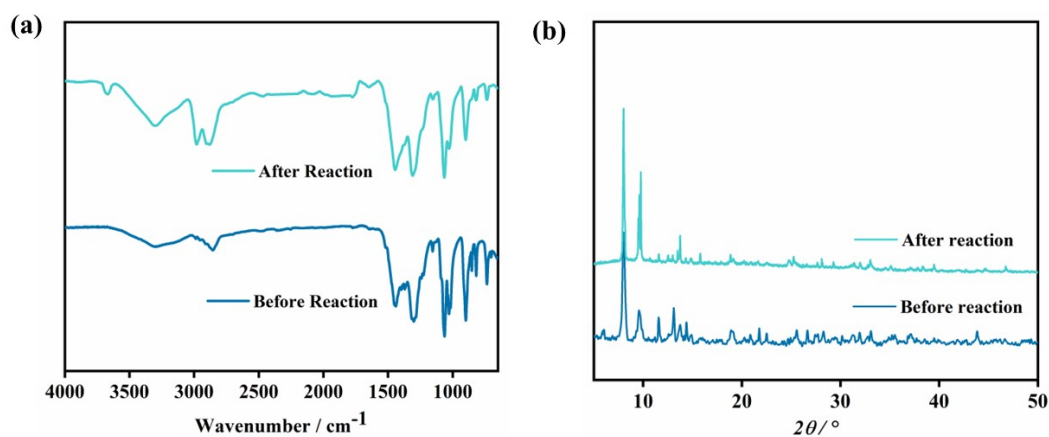

**Fig. S12** The IR spectra and PXRD of cluster **1** after recycled reaction of CO<sub>2</sub> and styrene oxide.

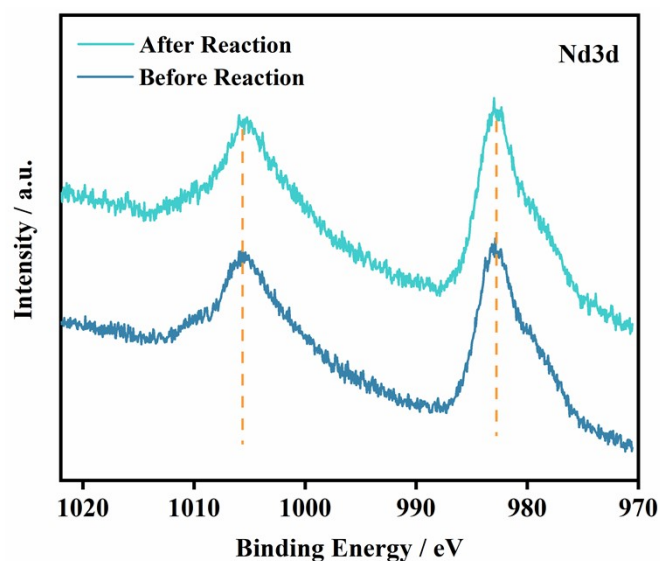

**Fig. S13** The XPS of cluster **1** for the reaction of CO<sub>2</sub> and styrene oxide.

### References

- 1 H. Xu, X. F. Liu, C. S. Cao, B. Zhao, P. Cheng and L. N. He, A porous metal–organic framework assembled by [Cu<sub>30</sub>] nanocages: serving as recyclable catalysts for CO<sub>2</sub> fixation with aziridines, *Adv. Sci.*, 2016, **3**, 1600048.
- 2 C. S. Cao, Y. Shi, H. Xu and B. Zhao, A multifunctional MOF as a recyclable catalyst for the fixation of CO<sub>2</sub> with aziridines or epoxides and as a luminescent probe of Cr(VI), *Dalton Trans.*, 2018, **47**, 4545-4553.
- 3 X. Wang, W. Y. Gao, Z. Niu, L. Wojas, A. Perman, J. Y. S. Chen, Z. Li, B. Aguila, S. Q. Ma, A metal–metalloporphyrin framework based on an octatopic porphyrin ligand for chemical fixation of CO<sub>2</sub> with aziridines, *Chem Commun*, 2018, **54**, 1170-1173.
- 4 X. R. Tian, Y. Shi, S. L. Hou, Y. Ma, and B. Zhao, Efficient cycloaddition of CO<sub>2</sub> and aziridines activated by a quadruple-interpenetrated Indium–organic framework as a recyclable catalyst, *Inorg. Chem.*, 2021, **60**, 15383–15389.
- 5 C. H. Zhang, Z. L. Wu, R. X. Bai, T. D. Hu, and B. Zhao, Highly efficient conversion of aziridines and CO<sub>2</sub> catalyzed by microporous [Cu<sub>12</sub>] nanocages, *ACS Appl. Mater. Interfaces*, 2023, **15**, 1879-1890.
- 6 Y. Shi, J. Zhao, H. Xu, S. L. Hou and B. Zhao, Eco-friendly co-catalyst-free cycloaddition of CO<sub>2</sub> and aziridines activated by a porous MOF catalyst, *Sci. China Chem.*, 2021, **64**, 1316-1322.

- 7 A. C. Kathalikkattil, R. Roshan, J. Tharun, R. Babu, G. S. Jeong, D. W. Kim, S. J. Choc, D. W. Park, A sustainable protocol for the facile synthesis of zinc-glutamate MOF: an efficient catalyst for room temperature CO<sub>2</sub> fixation reactions under wet conditions, *Chem Commun*, 2016, **52**, 280-283.
- 8 X. M. Kang, Z. H. Jiao, X. L. Shi, Y. D. Tian and Z. L. Liu, Difunctional Zn-based metal–organic frameworks: chemical conversion of CO<sub>2</sub> and luminescence recognition for secnidazole, *J. Mater. Chem. C*, 2022, **10**, 16078-16087.
- 9 X. M. Kang, Y. Shi, C. S. Cao and B. Zhao, Stable metal-organic frameworks with high catalytic performance in the cycloaddition of CO<sub>2</sub> with aziridines, *Sci. China Chem.*, 2019, **62**, 622-628.
- 10 H. Xu, B. Zhai, C. S. Cao and B. Zhao, A bifunctional europium–organic framework with chemical fixation of CO<sub>2</sub> and luminescent detection of Al<sup>3+</sup>, *Inorg. Chem.*, 2016, **55**, 9671-9676.
- 11 W. Z. Qiao, H. Xu, P. Cheng and B. Zhao. 3d–4f heterometal–organic frameworks for efficient capture and conversion of CO<sub>2</sub>, *Cryst. Growth Des.*, 2017, **17**, 3128-3133.
- 12 R. L. Zhang, L. Wang, C. Xu, H. Yang, W. M. Chen and G. S. Gao, Anion–induced 3d–4f luminescent coordination clusters: structural characters and chemical fixation of CO<sub>2</sub> under mild conditions. *Dalton Trans.*, 2018, **47**, 7159-7165.
- 13 N. Wei, R. X. Zuo, Y. Y. Zhang, Z. B. Han and X. J. Gu, Robust high–connected rare–earth MOFs as efficient heterogeneous catalysts for CO<sub>2</sub> conversion, *Chem. Commun.*, 2017, **53**, 3224-3227.
- 14 J. Dong, H. Xu, S. L. Hou, Z. L. Wu, B. Zhao, Metal–organic frameworks with Tb<sub>4</sub> clusters as nodes: luminescent detection of chromium(VI) and chemical fixation of CO<sub>2</sub>, *Inorg. Chem.*, 2017, **56**, 6244-6250.
- 15 Q. X. Han, L. Wang, Z. H. Shi, C. Xu, Z. Dong, Z. L. Mou, Self–assembly of luminescent lanthanide mesocates as efficient catalysts for transforming carbon dioxide into cyclic carbonates, *Chem Asian J*, 2017, **12**, 1364-1373.
- 16 T. Q. Song, J. Dong, A. F. Yang, X. J. Che, H. L. Gao, J. Z. Cui and B. Zhao, Wheel-like Ln<sub>18</sub> cluster organic frameworks for magnetic refrigeration and conversion of CO<sub>2</sub>, *Inorg. Chem.*, 2018, **57**, 3144–3150.



- 17 B. Zhao, H. Xu, C. S. Cao, H. S. Hu, S. B. Wang, J. C. Liu, P. Cheng, N. Kaltsoyannis and J. Li, High uptake of  $\text{ReO}_4^-$  by a radiation resistant  $[\text{Th}_4\text{Ni}_6]$  nanocage-based metal-organic framework, *Angew. Chem. Int. Ed.*, 2019, **58**, 6022-6027.
- 18 J. Dong, P. Cui, P. F. Shi, Ultrastrong alkali-resisting lanthanide-zeolites assembled by  $[\text{Ln}_{60}]$  nanocages, *J. Am. Chem. Soc.*, 2015, **137**, 15988-15991.
- 19 W. Z. Qiao, H. Xu, P. Cheng, B. Zhao, 3d-4f heterometal-organic frameworks for efficient capture and conversion of  $\text{CO}_2$ , *Cryst. Growth Des.*, 2017, **17**, 3128-3133.
- 20 L. Wang, R. L. Zhang, Q. X. Han, C. Xu, W. M. Chen, H. Yang, G. S. Gao, W. W. Qin, W. S. Liu, Amide-functionalized heterometallic helicate cages as highly efficient catalysts for  $\text{CO}_2$  conversion under mild conditions, *Green Chem.*, 2018, **20**, 5311-5317.
- 21 G. S. Gao, L. Wang, R. L. Zhang, C. Xu, H. Yang, W. S. Liu, Hexanuclear 3d-4f complexes as efficient catalysts for converting  $\text{CO}_2$  into cyclic carbonates, *Dalton Trans.*, 2019, **48**, 3941-3945.
- 22 W. Hou, G. Wang, X. J. Wu, S. Y. Sun, C. Y. Zhao, W. S. Liu, F. X. Pan, Lanthanide clusters as highly efficient catalysts regarding carbon dioxide activation, *New J. Chem.*, 2020, **44**, 5019-5022.
- 23 H. Yang, G. S. Gao, W. M. Chen, L. Wang, W. S. Liu, Self-assembly of tetranuclear 3d-4f helicates as highly efficient catalysts for  $\text{CO}_2$  cycloaddition reactions under mild conditions, *Dalton Trans.*, 2020, **49**, 10270-10277.
- 24 H. T. Chen, T. P. Hu, L. M. Fan, X. T. Zhang, One robust microporous  $\text{Tm}^{\text{III}}$ -organic framework for highly catalytic activity on chemical  $\text{CO}_2$  fixation and Knoevenagel condensation, *Inorg. Chem.*, 2021, **60**, 1028-1036.
- 25 H. T. Chen, L. M. Fan, T. P. Hu, X. T. Zhang,  $\text{V}=\text{O}$  functionalized  $\{\text{Tm}_2\}$ -organic framework designed by postsynthesis modification for catalytic chemical fixation of  $\text{CO}_2$  and oxidation of mustard gas, *Inorg. Chem.*, 2021, **60**, 5005-5013.
- 26 H. X. Lv, H. T. Chen, L. M. Fan, X. T. Zhang, Nanocage-based  $\text{Tb}^{3+}$ -organic framework for efficiently catalyzing the cycloaddition reaction of  $\text{CO}_2$  with epoxides and Knoevenagel condensation, *Inorg. Chem.*, 2022, **61**, 15558-15568.
- 27 H. X. Lv, L. M. Fan, C. X. Jiao, X. T. Zhang, Heterometallic  $\text{YbCo}$ -organic framework for efficiently catalyzing cycloaddition of  $\text{CO}_2$  with epoxides and Knoevenagel condensation, *Cryst. Growth Des.*, 2023, **23**, 2882-2892.

- 28 C. S. Cao, Y. Shi, H. Xu, B. Zhao, An uncommon multicentered Zn<sup>I</sup>-Zn<sup>I</sup> bond-based MOF for CO<sub>2</sub> fixation with aziridines/epoxides, *Chem. Commun.*, 2021, **57**, 7537-7540.
- 29 H. Xu, X. F. Liu, C. S. Cao, A porous metal-organic framework assembled by [Cu<sub>30</sub>] nanocages: serving as recyclable catalysts for CO<sub>2</sub> fixation with aziridines, *Adv. Sci.*, 2016, **3**, 1600048.
